# Supplementary material for: The Influence of OAT1 Density and Functionality on Indoxyl Sulfate Transport in the Human Proximal Tubule: An Integrated Computational and In Vitro Study
Source: MDPI journal article supplement (doi:10.3390/toxins13100674), 2021-09-22
Supplement: s1 [file s1]

# The Influence of OAT1 Density and Functionality on Indoxyl Sulfate Transport in the Human Proximal Tubule: An Integrated Computational and In Vitro Study

Jasia King, Silvia M. Mihaila, Sabbir Ahmed, Roman Truckenmüller, Stefan Giselbrecht, Rosalinde Masereeuw and Aurélie Carlier

**Table S1:** Conservation of mass calculation

| Time Point   | Toxin in Blood        | OAT bound Toxin       | OAT1 Unbound          | Toxin in Dialysate    | Total Toxin           | Total OAT1            |
|--------------|-----------------------|-----------------------|-----------------------|-----------------------|-----------------------|-----------------------|
| Start        | $1.51 \times 10^{14}$ | $0.00 \times 10^0$    | $3.68 \times 10^{14}$ | $0 \times 10^0$       | $1.51 \times 10^{14}$ | $3.68 \times 10^{14}$ |
| Steady State | $1.22 \times 10^{14}$ | $2.87 \times 10^{13}$ | $3.39 \times 10^{14}$ | $2.16 \times 10^{11}$ | $1.51 \times 10^{14}$ | $3.68 \times 10^{14}$ |

**Table S2.** All settings for COPASI parameter fitting models.

| COPASI Parameter Fitting Settings for Guessing Fitted Values for the Parameter Fitting Model |                                                                                        |                       |                       |                       |
|----------------------------------------------------------------------------------------------|----------------------------------------------------------------------------------------|-----------------------|-----------------------|-----------------------|
|                                                                                              | Parameter                                                                              | Initial Guess         | Lower Limit           | Upper Limit           |
| Case 1                                                                                       | $k_{f_{\text{Uptake}}}$ [s <sup>-1</sup> .μM <sup>-1</sup> ] IS binding to transporter | $1 \times 10^{-4}$    | $5 \times 10^{-7}$    | $1 \times 10^{-3}$    |
|                                                                                              | $k_{f_{\text{dissociation}}}$ [s <sup>-1</sup> ] IS dissociation from transporter      | $1 \times 10^{-3}$    | $5 \times 10^{-5}$    | $1 \times 10^{-3}$    |
|                                                                                              | [OAT1] [molecules.μm <sup>-2</sup> ] Density of transporter                            | $5 \times 10^6$       | $7 \times 10^5$       | $2 \times 10^7$       |
| Case 3                                                                                       | $k_{f_{\text{dissociation}}}$ [s <sup>-1</sup> ] IS dissociation from transporter      | $4.18 \times 10^{-4}$ | $4 \times 10^{-4}$    | $1 \times 10^{-3}$    |
|                                                                                              | $K_M$                                                                                  | $1 \times 10^2$       | $1 \times 10^0$       | $1 \times 10^3$       |
|                                                                                              | $V_{\text{Max}}$ [s <sup>-1</sup> ]                                                    | $1 \times 10^{-1}$    | $1 \times 10^{-5}$    | $1 \times 10^1$       |
| Case 3                                                                                       | $k_{f_{\text{dissociation}}}$ [s <sup>-1</sup> ] IS dissociation from transporter      | $1.69 \times 10^{-4}$ | $1.69 \times 10^{-5}$ | $1.69 \times 10^{-3}$ |
|                                                                                              | $K_M$                                                                                  | $1 \times 10^0$       | $1 \times 10^{-3}$    | $1 \times 10^3$       |
|                                                                                              | $V_{\text{Max}}$ [s <sup>-1</sup> ]                                                    | $1 \times 10^0$       | $1 \times 10^{-6}$    | $1 \times 10^2$       |
